# Supplementary material for: Dendritic Spine in Autism Genetics: Whole-Exome Sequencing Identifying De Novo Variant of CTTNBP2 in a Quad Family Affected by Autism Spectrum Disorder
Source: MDPI journal article supplement (doi:10.3390/children10010080), 2022-12-30
Supplement: s1 [file s1]

Supplementary Appendix

Supplementary Figures

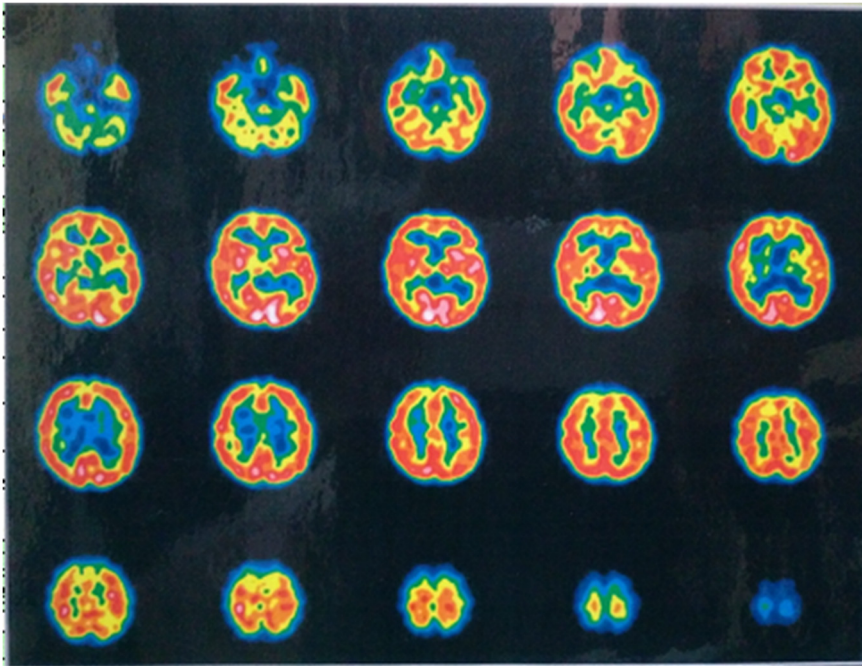

**Supplementary Figure S1.** Emission Computed Tomography showed focal perfusion and dysfunction.

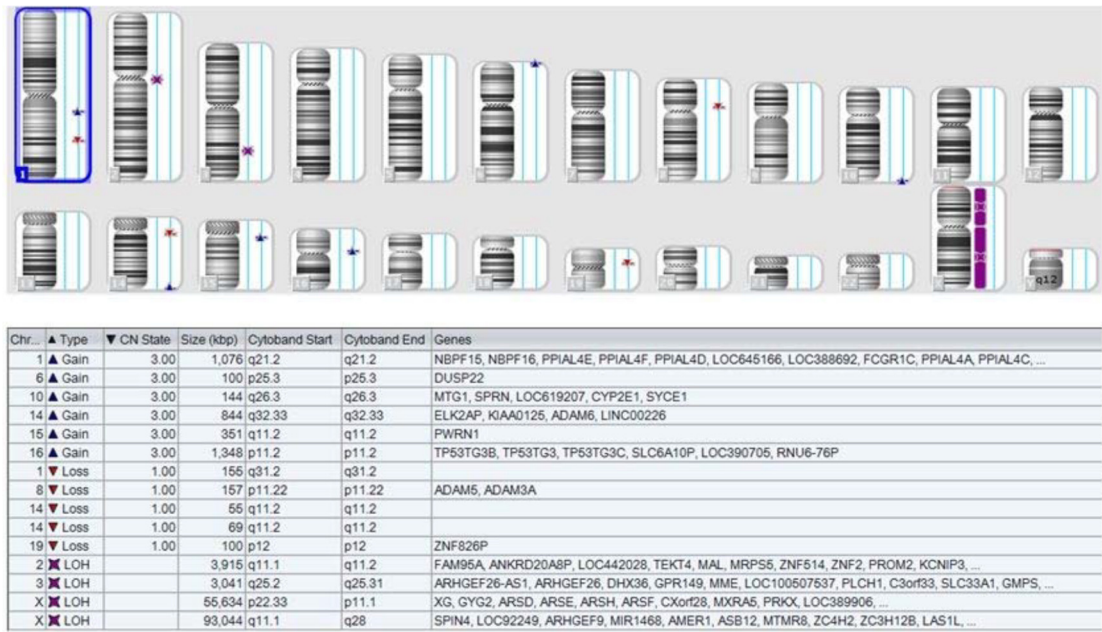

**Supplementary Figure S2.** Chromosome Microarray Report of proband. ▲ in

blue means copy number gain, ▼ in red means copy number loss, LOH, Loss of Heterozygosity;

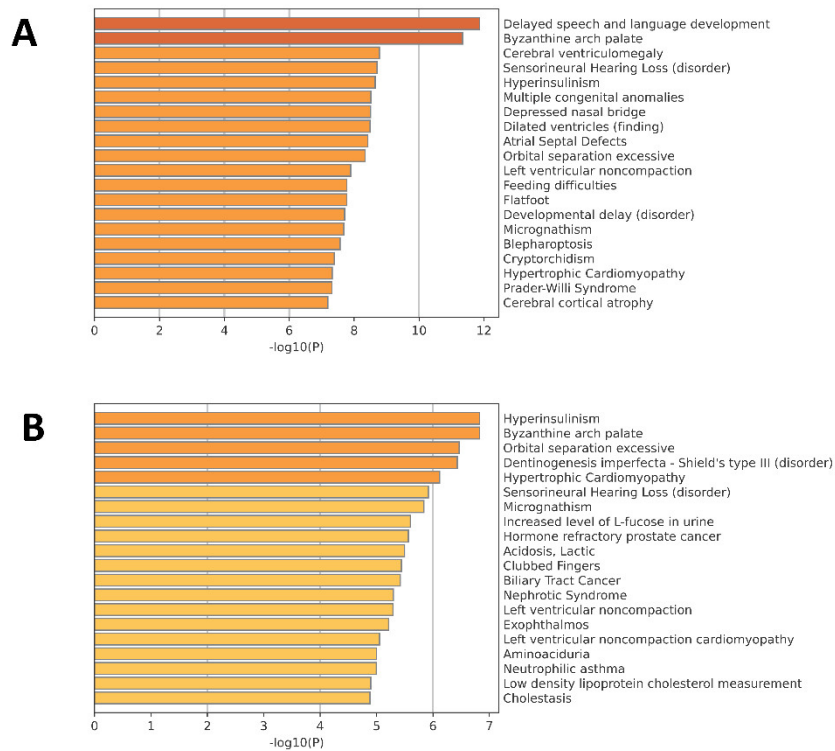

**Supplementary Figure S3. Genes Enriched analysis.** After initially filtering the public database for common variants and synonymous variants, a total of 541 variants were obtained from 248 genes, and after removing the SFARI genes, a total of 218 genes were obtained, the pathway enrichment analysis was performed using Metascape. A, all 248 genes were enriched to Delayed speech and language development and Byzanthine arch palate pathways; B, the 218 genes after removal of SFARI genes were enriched to Hyperinsulinism and Byzanthine arch palate pathways.
